# Supplementary material
Source: Research Square preprint supplement (doi:10.21203/rs.3.rs-8753984/v1)
Supplement: Supplementary file 1 [file 149fdc5f28986d3fefae2073.docx]

**Supplementary Material**

**Title of the article**: Establishment of a Gene Expression Signature for Colitis-Associated Colorectal Cancer to Assess Cancer-Promoting Effects of Standard IBD Treatments

**Authors:** Sarah Pashapour, Nesa Kazemifard

**Corresponding Authors:** Shaghayegh Baradaran Ghavami1, Mohammad Kazemi2

*1 Department of Genetics and Molecular Biology, School of Medicine, Isfahan University of Medical Sciences, Isfahan, Iran*

*2 Basic and Molecular Epidemiology of Gastrointestinal Disorders Research Center Research Institute for Gastroenterology and Liver Diseases, Shahid Beheshti University of Medical Sciences Tehran Iran.*

**Supplementary Method**

Selected datasets underwent quality control analysis using R packages ggplot2 and grid to perform principal component analysis (PCA). After merging datasets, the final merged dataset included 87 controls, 161 UC, 137 CRC and 11 CAC samples.

**Supplementary Result**

After merging datasets, the final merged dataset included 87 controls, 161 UC, 137 CRC and 11 CAC samples.

**Supplementary Figure S1**

**Title:** PCA provided by R software


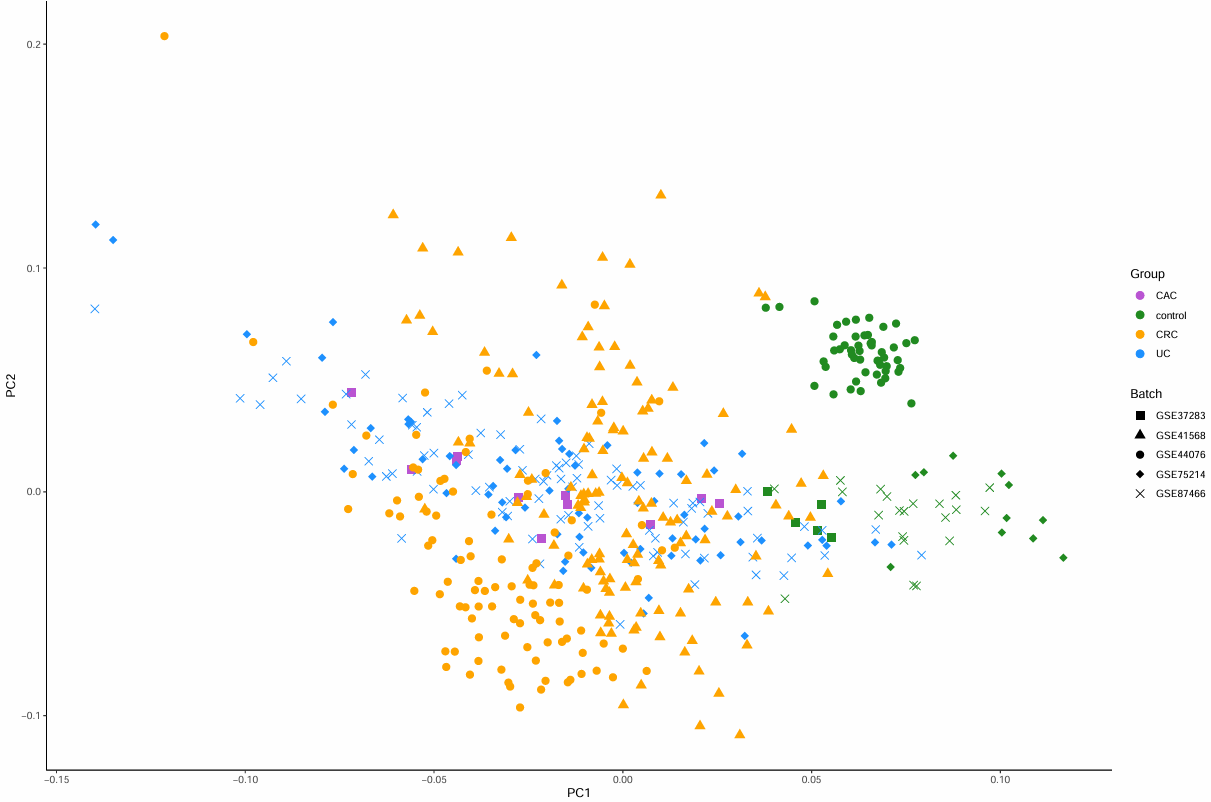


**Legend:** Colors mention disease groups and shape of the samples are indication of different batches. As presented in the plot, after applied batch correction, samples are divided by their disease. Ovels around samples of each disease are for more clearance of division.

**Supplementary Notes**

Scripts used for data analysis are available from the corresponding author upon reasonable request.
